# Supplementary material for: Human canonical CD157/Bst1 is an alternatively spliced isoform masking a previously unidentified primate-specific exon included in a novel transcript
Source: PubMed Central journal article supplement (PMC5698419; doi:10.1038/s41598-017-16184-w), 2017-11-21

**Human canonical CD157/Bst1 is an alternatively spliced isoform  
masking a previously unidentified primate-specific exon included in a  
novel transcript**

Enza Ferrero<sup>1\*</sup>, Nicola Lo Buono<sup>1,2</sup>, Simona Morone<sup>1</sup>, Rossella Parrotta<sup>1</sup>, Cecilia Mancini<sup>3</sup>,  
Alfredo Brusco<sup>3</sup>, Alice Giacomino<sup>1</sup>, Stefania Augeri<sup>1</sup>, Antonio Rosal-Vela<sup>4</sup>, Sonia García-  
Rodríguez<sup>4</sup>, Mercedes Zubiaur<sup>4</sup>, Jaime Sancho<sup>4</sup>, Alessandra Fiorio Pla<sup>5</sup> and Ada Funaro<sup>1\*</sup>

<sup>1</sup>Laboratory of Immunogenetics, Department of Medical Sciences, University of Torino,  
10126 Torino, Italy.

<sup>2</sup>San Raffaele Diabetes Research Institute, San Raffaele Hospital, 20132 Milano, Italy.

<sup>3</sup>Laboratory of Medical Genetics, Department of Medical Sciences, University of Torino,  
10126 Torino, Italy.

<sup>4</sup>Department of Cellular Biology and Immunology, Instituto de Parasitología y Biomedicina  
López-Neyra, IPBLN-CSIC, Parque Tecnológico de la Salud de Granada, 18016 Granada,  
Spain.

<sup>5</sup>Department of Life Sciences and Systems Biology, University of Torino, 10123 Torino,  
Italy.

\*Corresponding authors

Enza Ferrero: [enza.ferrero@unito.it](mailto:enza.ferrero@unito.it)

Ada Funaro: [ada.funaro@unito.it](mailto:ada.funaro@unito.it)

## SUPPLEMENTARY INFORMATION

### Figure legends

**Supplementary Figure 1. Genomic nucleotide sequence of human *BST1* from exon 1 to exon 2, encompassing exon 1b.** Nucleotide sequence of human *BST1* from the 5' end of exon 1 to the 3' end of exon 2. Exons 1 and 2 are shaded in blue; exon 1b is shaded in orange. GT/AG splice sites are shaded in yellow. The branch point (open box) and polypyrimidine tract (grey box) associated with exon 1b are indicated. The nucleotide sequence was analysed for splicing signals using Human Splicing Finder<sup>1</sup> and the SROOGLE program<sup>2</sup>.

**Supplementary Figure 2. Quantification of *BST1* transcripts.** Expression levels of *BST1-001* (top panel) and *BST1-002* (lower panel) in ten PMN samples purified from peripheral blood of healthy subjects. Transcript expression was calculated relative to the *GUSB* endogenous control, using the  $\Delta\Delta C_t$  method. Bars represent the fold change of each sample relative to the mean of all samples analysed. Each PMN sample was examined in triplicate (n = 3).

**Supplementary Figure 3. Uncut gels for *BST1* expression profiles by RT-PCR.**

**Supplementary Figure 4. Original gels for western blotting.** Top panel show gels from which band images were obtained for CD157 detection by western blotting; bottom panel shows original gel strips for phosphorylation analyses by western blot.

**Supplementary Figure 5. Original blot showing CD157 in PMN and U937.**

## Supplementary References

1. Desmet, F. O. *et al.* Human Splicing Finder: an online bioinformatics tool to predict splicing signals. *Nucleic acids research* **37**, e67, doi:10.1093/nar/gkp215 (2009).
2. Schwartz, S., Hall, E. & Ast, G. SROOGLE: webserver for integrative, user-friendly visualization of splicing signals. *Nucleic acids research* **37**, W189-192, doi:10.1093/nar/gkp320 (2009).

Exon 1

1 GAGAAGGGGA GTGGAGGAAG CACGGGACTG GAGGGACCAA AGTTCCCCGA TGGCGGCCCA  
61 GGGGTGCGCG GCATCGCGGC TGCTCCAGCT GCTGCTGCAG CTTCTGCTTC TACTGTTGCT  
121 GCTGGCGGCG GGCGGGGCGC GCGCGCGGTG GCGCGGGGAG GGCACCAGCG CACACTTGCG  
181 GGACATCTTC CTGGGCCGCT GCGCCGAGTA CCGCGCACTG CTGAGTCCCC AGCAGCGGTG  
241 AGGCAGTCGG CCGGGTGGAA GGGGAGCCGG AAAGAGGCAA CCGTGGGGAG GGCCTGGGGA  
301 GGGGAAAAC TGGCGTAAAG TTCGGGGTGA GGGGGCAATG AGAGAGGCCT TGAGGGGAGA  
361 GGTGAGTGTG GAGACAGCGA TGGTCTGAA CGATGGGGGC GAGTGAGGAG GGGGCTGTGA  
421 AGTGTGTCTG CAGGTGAGGG GTGCGCTGTG CGGGGTCTAG AGATGAGTGT GTGTGTGTGC  
481 GCGCACACAC AACTGTAGA GGTGAGGGGT GTGTGCGTGT GTTCTAGAGG TGAGGGGGGT  
541 GTGTGTGTGC GCGCCTCTA GAGGTGGGAG GTGTGTGTGT GCTCTAGAGG TGGATGTGTG  
601 TGTGTGTGCT CTAGAGGTGG GGTGTGTGT GTGTGTGTGT GCTCTAGAGG TGAGGGGTGT  
661 GTGTGTGTGT TCTAAAGGTG AGATGTGTGT GTGTGTTCTA GAGGTAAGGG GTGTGTGTGT  
721 TCCAGAGGTG AGGTGTCTGT ATGTGTGTTT TAGAGGTGAG GGGTGTGTGC ATGTGTGTTC  
781 TAGAGGTGAA GGGGTGTGT GTGCGTGC GC TCTAGAGGTG AGGGGTGTGT GTATTCTAGA  
841 GGTGAGGGGT GTGTGTGTTT TAGAAGTGAG GGGTGTGTGT GTTCTGGAGG TGAGATGTGT  
901 GTGTGTGTGT TCTAGAGGTG AGGGGTGCGT GCATGTGTTC TAGAGGTGTG TGTGTATCTG  
961 TGTTCTAGAG GTGAGGGGTG TGTGTGTGTA GTCTAGAGGT GACAGGTGTG TGTGTGTGGT  
1021 CTATAGGTGA GGGATGTGTG TGTGGTCTAG AGGTGAGGGA TGTGTGTGTG GTCTAGAGGT  
1081 GAGGGGTGTG TGTGTTCTAG AGGTGAGGGG GTGTATGTGT ATTCTAGAGC TGAGGAGAGT  
1141 GTGTGTTCTA GAGATGAGGT GTGTATGTGT GTTCTAGAGG TGAGGGGTGT GTGTGTGTTT  
1201 TGGAGTTGAG GGGTGTGTGT TCTAGAGGTG AGATGTGTGT GTTCTAGAGA TGATGGGTGT  
1261 GTGTGTTCTA GAAGTGAGAG GTGTGTGTGT TCTAGAGGTA AGGGATGTGT GTGTGTGTGT  
1321 GTTCTAGAGG TGAGTTGTGT GTGTGTTCTA GAGGTGAGAT GTGTGTGTGT TTGTTCTAGA  
1381 GGTGAGGGGT GTGTGTGTGT AGTCTAGAGG TGACAGGTGT GTGTGTGTGG TCTATAGGTG  
1441 AGGGATGTGT GTGTGGTCTA GAGGTGAGGG ATGTGTGTGT GGTCTAGAGG TGAGAGGTGT  
1501 GTGTGAGTGT GAAGGAGGGT GGAGAGGTAT CCCTCTAGAA GTGAGGGTGG GGTAGAGGTG  
1561 AACTGGGTAA CAGCCCATTC CCACCCAGCA GATGTTTAGT CTGAATACTC AGAACCCAGA  
1621 ATGTGATCTC AGGTTGGAAT TCCTGAGTC CAGTCCTTCC AGAATTCAA TTTAGATCC  
1681 CCTAAATCTG GAGGATTTCT GAAGTTTGGG TCTTTCTTGC CAGTGC TGCA TTTCTTACTG  
1741 ATTTTTGTTC CTTCTGTGGC CCCCTTTTTC TTATGTTTGT GATGCTTTC TTGTTGCTGAT

← Branch point

Polypyrimidine Tract

Exon 1b

1801 CTTTTTATT GTGCACATT TCAGGCAAAT AAGAAACAGC AGAGAACCAC CTGTGTTACA  
1861 CACCACCCAG TATGAGAAAC AAAGTTACAA ATGCTATGGG AAATATTTTT TGA AAACTAG  
1921 CATGGACCTC AAGAGGGGCT TGCACTGGAG GGTGCACCTG CTTTGCCAGA GGTGGAAGCC  
1981 TTTTGCAGCA TTGGGCTCC CTCTAACAC TACACATCCT GCTGGCTGGC CTGGCCTCAC  
2041 CTGGTCCCG AGCTCCACAC TGA AACTGGA CTATGAGACT GGCCCAACCG TTAGTCTAA  
2101 ATGAAGAGGC ACCTGCTGTA TAGTTGACTG AATTTGTCAC CTCCTGCTCG GTGCCATTTT  
2161 TGCTTGCTC CGTGAGCCTG GGCAAGGCT GTATTCCTTA GCTCTGAGAA ATCTGTGCAG  
2221 TGCCTT CAGA GAGACAATTC CAGTGCAGA TTTCTGAATC TGTCACCTAA GCCATGACAA  
2281 TTCGTTGTCT TTTTGTAAAG C TACTTCTG CAGTTACTAT ATGAAAAATC TCTGTAAAG  
2341 CTCTTAGACA AATGGGCATA CTT CACAACA CATTATGATG TGCATGTGTG TGTCTTCC  
2401 AACTTG TACT TTTGCACAGG AACAAGA ACT GCACAGCCAT CTGGGAAGCC TTTAAAGTGG  
2461 CGCTGGACAA GGATCCCTGC TCCGTGCTGC CCTCAGACTA TGACCTTTTT ATTA ACTTGT  
2521 CCAGGCACTC TAT TCCAG A GATAAG

Exon 2

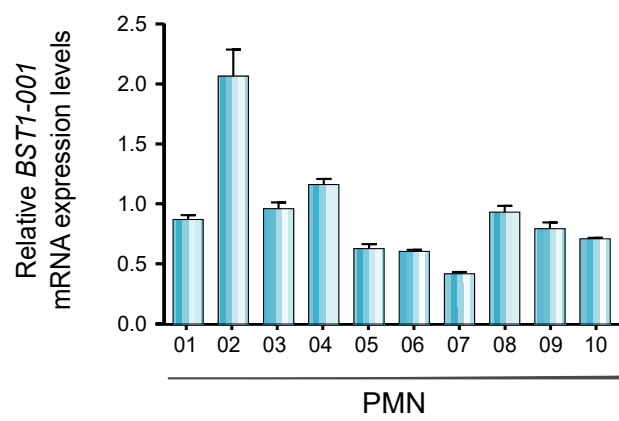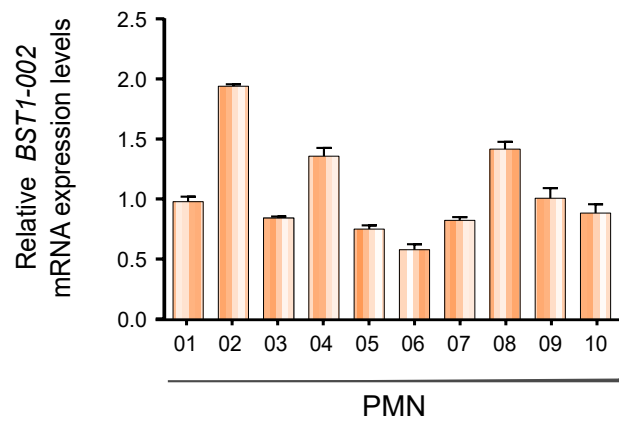

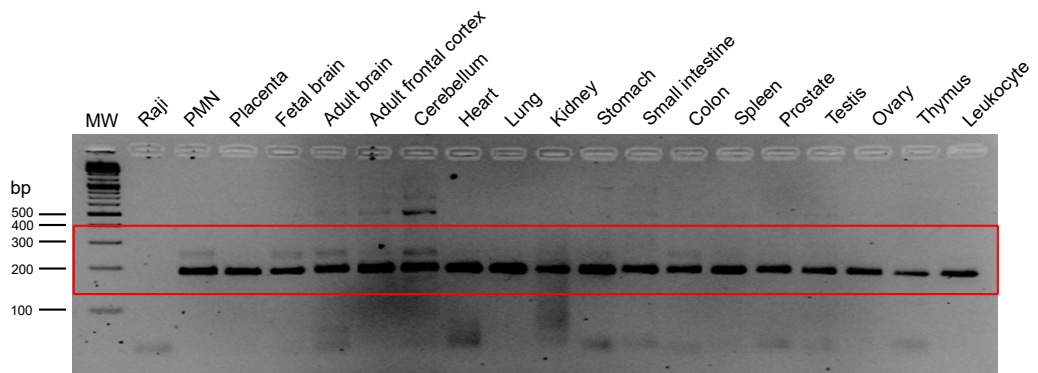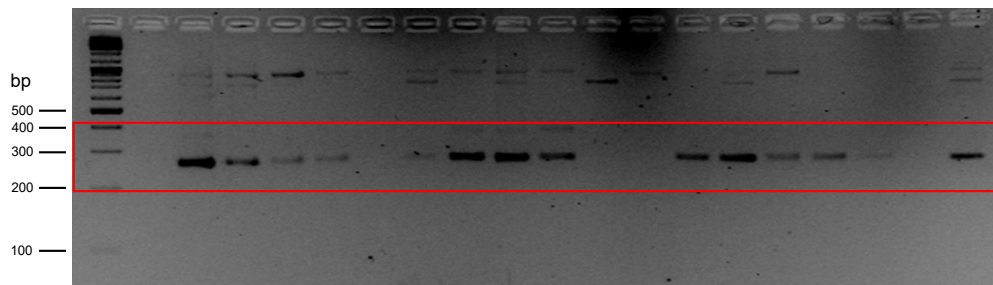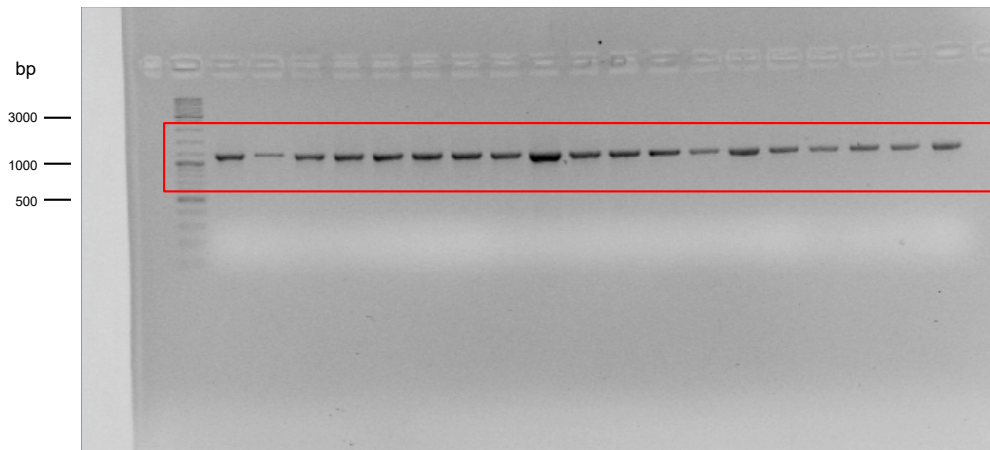

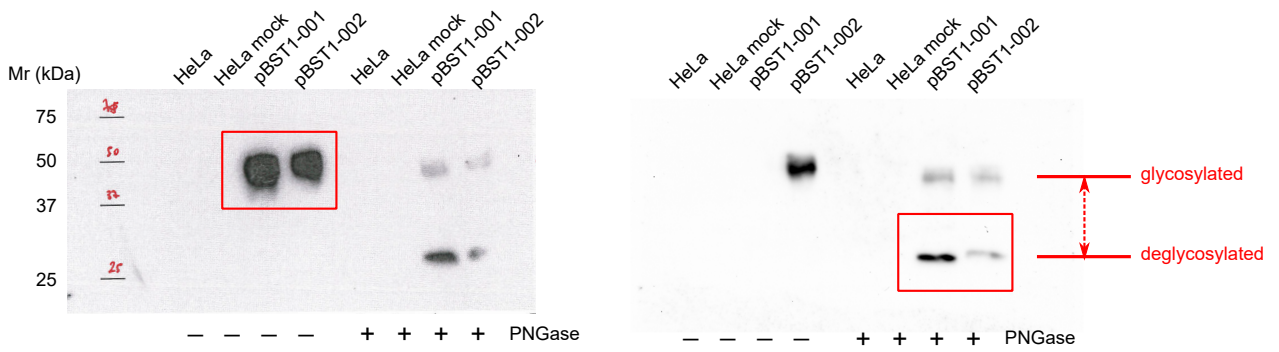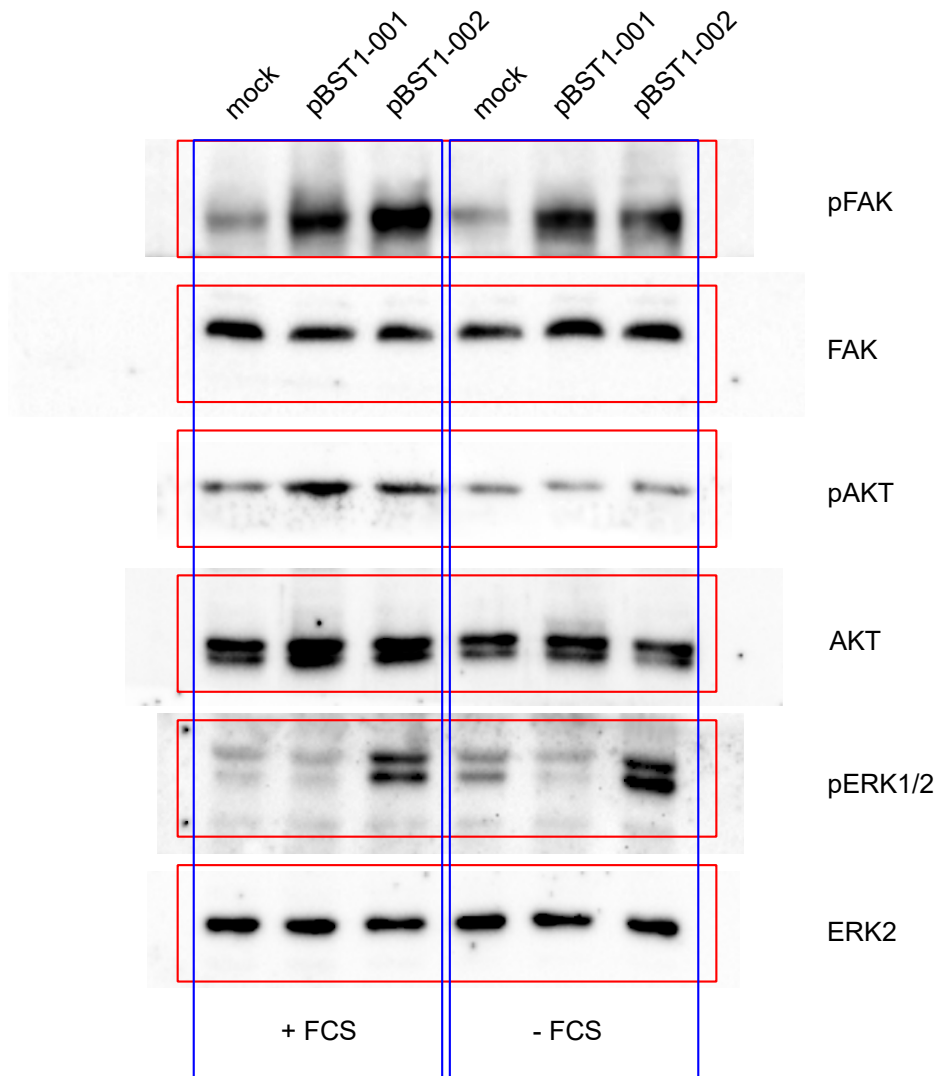

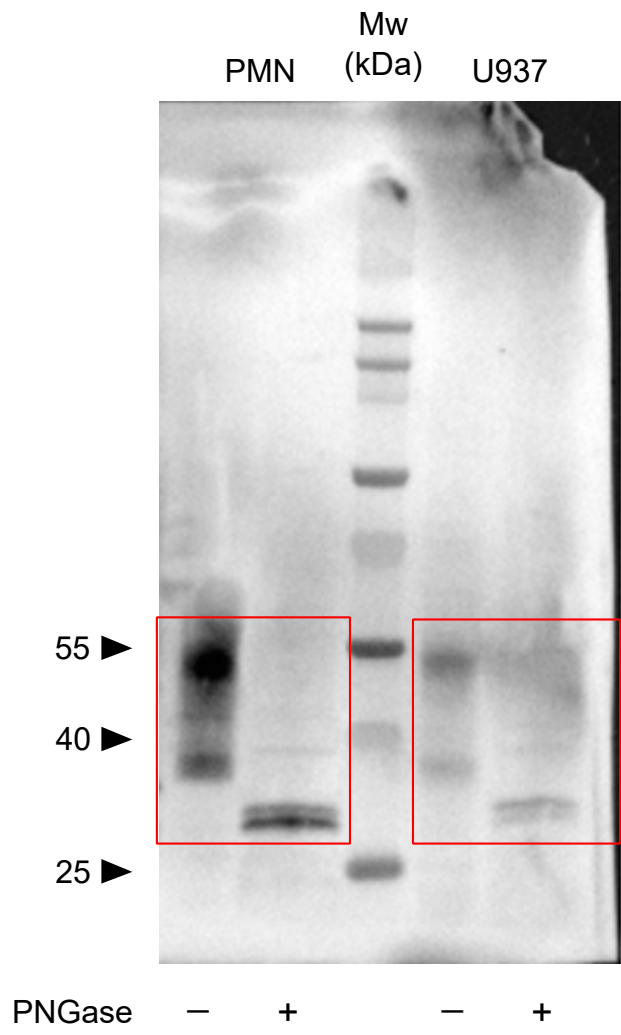

Supplement: 41598_2017_16184_MOESM1_ESM.pdf [file 41598_2017_16184_MOESM1_ESM.pdf]
